# Supplementary material for: Comparative Effectiveness of Bimekizumab and Risankizumab in Patients with Psoriatic Arthritis at 52 Weeks Assessed Using a Matching-Adjusted Indirect Comparison
Source: PubMed Central journal article supplement — Rheumatol Ther. 2024 Aug 9;11(5):1403–12. doi: 10.1007/s40744-024-00706-w (PMC11422408; doi:10.1007/s40744-024-00706-w), 2024-08-09
Supplement: 40744_2024_706_MOESM1_ESM.pdf [file 40744_2024_706_MOESM1_ESM.pdf]

# **Comparative Effectiveness of Bimekizumab and Risankizumab in Patients with Psoriatic Arthritis at 52- Weeks Assessed Using a Matching-Adjusted Indirect Comparison**

## **Supplementary Information**

Philip J. Mease<sup>1</sup>, Richard B. Warren<sup>2</sup>, Peter Nash<sup>3</sup>, Jean-Marie Grouin<sup>4</sup>, Nikos Lyris<sup>5</sup>, Damon Willems<sup>6</sup>, Vanessa Taieb<sup>7</sup>, Jason Eells<sup>5</sup>, Iain B. McInnes<sup>8</sup>

*<sup>1</sup>Swedish Medical Center/Providence St. Joseph Health and University of Washington, Seattle, WA, USA; <sup>2</sup>Dermatology Centre, Northern Care Alliance NHS Foundation Trust, The University of Manchester, Manchester Academic Health Science Centre, NIHR Manchester Biomedical Research Centre, Manchester, UK; <sup>3</sup>School of Medicine, Griffith University School of Medicine, Brisbane, Queensland, Australia; <sup>4</sup>University of Rouen, Rouen, France; <sup>5</sup>UCB Pharma, Slough, UK; <sup>6</sup>UCB Pharma, Brussels, Belgium; <sup>7</sup>UCB Pharma, Colombes, France; <sup>8</sup>University of Glasgow, College of Medical Veterinary and Life Sciences, Glasgow, UK*

**Correspondence to:** Philip J. Mease ([pmease@phillipmease.com](mailto:pmease@phillipmease.com))  
Swedish Medical Center and Providence St. Joseph Health  
601 Broadway  
Seattle, WA 98122

**Table S1. Unadjusted and adjusted response rates for bimekizumab (BE OPTIMAL) vs risankizumab (KEEPSAKE-1) at Week 52 (bDMARD-naïve patient subgroup)**

| <b>BKZ 160 mg Q4W</b>                                    | <b>ACR20</b>            | <b>ACR50</b>                       | <b>ACR70</b>                       | <b>MDA</b>              |
|----------------------------------------------------------|-------------------------|------------------------------------|------------------------------------|-------------------------|
| <b>vs. RIS 150 mg Q12W</b>                               |                         |                                    |                                    |                         |
| <b>RIS response rate – % (95% CI) (N=483)</b>            | 69.98<br>(65.88, 74.08) | 43.27<br>(38.84, 47.70)            | 25.88<br>(21.96, 29.80)            | 37.89<br>(33.55, 42.23) |
| <b>BKZ unadjusted response rate - % (95% CI) (N=431)</b> | 71.23<br>(66.94, 75.52) | 54.52<br>(49.81, 59.24)            | 39.21<br>(34.59, 43.83)            | 54.99<br>(50.28, 59.70) |
| <b>Unadjusted OR (95% CI)</b>                            | 1.06<br>(0.80, 1.41)    | 1.57<br>(1.21, 2.04)               | 1.85<br>(1.39, 2.45)               | 2.00<br>(1.54, 2.61)    |
| <b>BKZ ESS</b>                                           | 231.00                  | 231.00                             | 231.00                             | 231.00                  |
| <b>BKZ adjusted response rate - % (95% CI)</b>           | 70.37<br>(65.29, 75.46) | 53.75<br>(48.20, 59.30)            | 38.55<br>(33.13, 43.96)            | 44.99<br>(39.45, 50.53) |
| <b>Adjusted OR (95% CI)</b>                              | 1.02<br>(0.72, 1.45)    | <b>1.52</b><br><b>(1.11, 2.09)</b> | <b>1.80</b><br><b>(1.29, 2.51)</b> | 1.34<br>(0.98, 1.84)    |
| <b>p-value</b>                                           | 0.916                   | <b>0.009</b>                       | <b>&lt;0.001</b>                   | 0.068                   |

Trial populations adjusted for: age, sex, BSA≥3%, HAQ-DI, MTX, SJC, TJC.

Note: Significant ORs are highlighted in bold.

ACR, American College of Rheumatology; ACR20/50/70, at least a 20/50/70% improvement according to the ACR response criteria; BKZ, bimekizumab; BSA, body surface area; CI, confidence interval; ESS, effective sample size; HAQ-DI, Health Assessment Questionnaire Disability Index; MDA, minimal disease activity; MTX, methotrexate; OR, odds ratio; Q4W, every 4 weeks; Q12W, every 12 weeks; RIS, risankizumab; SJC, swollen joint count; TJC, tender joint count.

**Table S2. Unadjusted and adjusted response rates for bimekizumab (BE COMPLETE/BE VITAL) vs risankizumab (KEEPSAKE-2) at Week 52 (TNFi-IR patient subgroup)**

| <b>BKZ 160 mg Q4W</b>                                    | <b>ACR20</b>                       | <b>ACR50</b>                       | <b>ACR70</b>                       | <b>MDA</b>                         |
|----------------------------------------------------------|------------------------------------|------------------------------------|------------------------------------|------------------------------------|
| <b>vs. RIS 150 mg Q12W</b>                               |                                    |                                    |                                    |                                    |
| <b>RIS response rate – % (95% CI) (N=106)</b>            | 49.06<br>(39.43, 58.68)            | 21.70<br>(13.76, 29.64)            | 10.38<br>(4.50, 16.25)             | 18.87<br>(11.33, 26.40)            |
| <b>BKZ unadjusted response rate - % (95% CI) (N=267)</b> | 68.16<br>(62.55, 73.78)            | 51.69<br>(45.66, 57.71)            | 35.58<br>(29.81, 41.35)            | 47.19<br>(41.18, 53.21)            |
| <b>Unadjusted OR (95% CI)</b>                            | 2.22<br>(1.40, 3.53)               | 3.86<br>(2.29, 6.51)               | 4.77<br>(2.43, 9.38)               | 3.84<br>(2.23, 6.63)               |
| <b>BKZ ESS</b>                                           | 161.91                             | 161.91                             | 161.91                             | 161.91                             |
| <b>BKZ adjusted response rate - % (95% CI)</b>           | 63.20<br>(56.63, 69.77)            | 45.77<br>(38.99, 52.56)            | 29.92<br>(23.69, 36.16)            | 36.12<br>(29.58, 42.66)            |
| <b>Adjusted OR (95% CI)</b>                              | <b>1.78</b><br><b>(1.08, 2.96)</b> | <b>3.05</b><br><b>(1.74, 5.32)</b> | <b>3.69</b><br><b>(1.82, 7.46)</b> | <b>2.43</b><br><b>(1.37, 4.32)</b> |
| <b>p-value</b>                                           | <b>0.025</b>                       | <b>&lt;0.001</b>                   | <b>&lt;0.001</b>                   | <b>0.003</b>                       |

Trial populations adjusted for: age, sex, BSA $\geq$ 3%, HAQ-DI, MTX, SJC, TJC.

Note: Significant ORs are highlighted in bold.

ACR, American College of Rheumatology; ACR20/50/70, at least a 20/50/70% improvement according to the ACR response criteria; BKZ, bimekizumab; BSA, body surface area; CI, confidence interval; ESS, effective sample size; HAQ-DI, Health Assessment Questionnaire Disability Index; MDA, minimal disease activity; MTX, methotrexate; OR, odds ratio; Q4W, every 4 weeks; Q12W, every 12 weeks; RIS, risankizumab; SJC, swollen joint count; TJC, tender joint count.
